# Supplementary material for: HSPB1 facilitates chemoresistance through inhibiting ferroptotic cancer cell death and regulating NF-κB signaling pathway in breast cancer
Source: Springer Nature journal article supplement (doi:10.1038/s41419-023-05972-0), 2023-07-15
Supplement: MOESM1 [file 41419_2023_5972_MOESM1_ESM.pdf]

**HSPB1 facilitates chemoresistance through inhibiting ferroptotic cancer cell death and regulating NF- $\kappa$ B signaling pathway in breast cancer**

Yiran Liang<sup>1,#</sup>, Yajie Wang<sup>1,#</sup>, Yan Zhang<sup>1,2</sup>, Fangzhou Ye<sup>1</sup>, Dan Luo<sup>1</sup>, Yaming Li<sup>1</sup>,  
Yuhan Jin<sup>1</sup>, Dianwen Han<sup>1</sup>, Zekun Wang<sup>1</sup>, Bing Chen<sup>3</sup>, Wenjing Zhao<sup>3</sup>, Lijuan Wang<sup>3</sup>,  
Xi Chen<sup>1</sup>, Tingting Ma<sup>1</sup>, Xiaoli Kong<sup>1</sup>, and Qifeng Yang<sup>1,3,4,\*</sup>

<sup>1</sup>Department of Breast Surgery, Qilu Hospital, Cheeloo College of Medicine, Shandong University, Jinan, Shandong, 250012, China

<sup>2</sup>Department of Breast Surgery, Jinan Central Hospital, Cheeloo College of Medicine, Shandong University, Jinan, Shandong, 250013, China

<sup>3</sup>Pathology Tissue Bank, Qilu Hospital of Shandong University, Jinan, Shandong, 250012, China

<sup>4</sup>Research Institute of Breast Cancer, Shandong University, Jinan, Shandong, 250012, China

<sup>#</sup> These authors contributed equally to this work.

<sup>\*</sup>Correspondence: Qifeng Yang

Qilu Hospital, Cheeloo College of Medicine, Shandong University, Wenhua Xi Road No. 107, Jinan 250012, Shandong, China; Fax: +86-531-82169470; E-mail: qifengy\_sdu@163.com

## **Supplementary Materials and Methods**

### **Cell transfection**

The full length of HSPB1 was cloned into pcDNA3.1 (Invitrogen, Carlsbad, California, USA) to generate pcDNA3.1-HSPB1 constructs. After transfection with the overexpression vectors or empty vectors, cells were selected by G418 (1 µg/ml) for 2 months until the formation of visible clones. The survived cell clones were amplified and the overexpression efficiency of individual clones was confirmed using qRT-PCR assays. The satisfactory clones were identified as stably transfected cells and used for in vivo experiments. The siRNAs were purchased from GenePharma (Shanghai, China), and the target sequences for HSPB1, IκB-α, and Control are listed in Table S4. Lipofectamine 2000 (Invitrogen, 11668019, Carlsbad, California, USA) was used for cell transfection following the manufacturer's instructions.

### **Cell proliferation assays**

Cell proliferation assays were performed using MTT assay. Briefly, 1 500 transfected cells were seeded into a 96-well plate. Cell proliferation was assessed after indicated time. The cells were incubated for 4-6 h after the addition of 20 µl MTT (5 mg/ml) per well. Then, the culture supernatant was removed and 100 µl DMSO was added into each well. The absorbance was measured at 490 nm using a Microplate Reader (Bio-Rad, Hercules, California, USA).

### **IC50 detection and cytotoxic assay**

The transfected cells were cultured in 96-well plates (3 000 cells/well). For IC50 detection, cells were grown in complete medium containing different concentrations of doxorubicin (MCE, HY-15142A, New Jersey, USA) or paclitaxel (MCE, HY-B0015, New Jersey, USA) for 48 h. The cell survival rate was further evaluated by MTT assay. For cytotoxic assay, cells were treated differently as indicated using doxorubicin, paclitaxel, or erastin (MCE, HY-15763, New Jersey, USA) with or without ferrostatin-1 (MCE, HY-100579, New Jersey, USA) for 48 h. The cell viability was assessed by MTT assay and presented as relative to the absorbance value of the control group.

### **Colony formation assay**

1 000 Transfected cells were seeded into 6 cm plates and cultured for over 2 weeks. Then, cells were washed with PBS, fixed with methanol for 15 min and subsequently stained with 0.2% crystal violet for 20 min at room temperature. Colonies were counted and photographed.

### **EdU incorporation assay**

The measurement of proliferative cells and nucleic acid were performed using EdU incorporation assay kit (RiboBio, C10310-1, Guangzhou, China) according to the manufacturer's instructions. Briefly,  $2 \times 10^4$  transfected cells were seeded into a 96-well plate per well for 24 h. After incubation with 50  $\mu$ M EdU for another 2.5 h, cells were washed with PBS, fixed with 4% paraformaldehyde (PFA) for 30 min, and

permeabilized with 0.5% Triton X-100 for 10 min. Subsequently, cells were stained with 1× Apollo Dye Solution for 30 min and 1× Hoechst for 30 min at room temperature in the dark. The images were obtained under a fluorescence microscope (ZEISS, Jena, Germany) and positive cells were counted.

### **Wound healing assay**

The transfected cells were seeded in a 24-well culture plate and cultured until reaching to 90% confluence. The cell monolayer was scratched using a sterile tip (10 µl), washed with PBS, and cultured with serum-free DMEM. Photographs were taken with a light microscope at the indicated time.

### **Migration and invasion assays**

For migration assays, 80 000 transfected cells resuspend with serum-free DMEM were seeded into the upper insert of transwell chamber (pore size 8 µm; Corning, New York, USA). 700 µl medium supplemented with 20% FBS were put into the lower chambers. For invasion assays, the transwell chambers were coated with Matrigel (Corning, 356232, New York, USA) solution. After incubation for 24-48h, the cells penetrated to the lower surface of the membrane were fixed with methanol for 15 min and then stained with 0.2% crystal violet for 20 min. Then the stained cells were photographed and counted.

### **RNA preparation and qRT-PCR**



Total RNA was extracted from cells or frozen tissues using the RNAiso Plus (Total RNA extraction reagent) (Takara, 9108, Kyoto, Japan). The complementary DNA (cDNA) was synthesized using a PrimeScript reverse transcriptase (RT) reagent kit (Takara, RR037B, Kyoto, Japan). The expression of mRNA was examined by real-time quantitative-PCR (qRT-PCR) using TB Green<sup>TM</sup> Advantage<sup>®</sup> qPCR Premix (Takara, 639676, Kyoto, Japan) and a LightCycler480 Detection System (Roche, Germany). The relative expression of indicated genes was analyzed by the  $2^{-\Delta\Delta C_t}$  method.  $\beta$ -actin was used as normalization control. The primer sequences used for qRT-PCR are listed in Table S5.

### **Western blot analysis**

Total protein was extracted from cells or frozen tissues using the RIPA lysis buffer (Beyotime, P0013, Shanghai, China) with protease inhibitor (PMSF) and phosphatase inhibitor (NaF). The protein concentration was determined using a BCA protein assay kit (Beyotime, P0010, Shanghai, China). The protein samples were separated by 10% SDS-PAGE gel and then transferred to a 0.22  $\mu$ m polyvinylidene difluoride (PVDF) membrane (Millipore, Billerica, Massachusetts, USA) in a wet electron transfer device. Then, the membrane was blocked using 5% skimmed milk in TBST for 1 h at room temperature and incubated with the primary antibody overnight at 4 °C. The next day, after incubation with the secondary antibody for 1 h at room temperature, an enhanced chemiluminescence (ECL) kit (Vazyme, E423-01, Nanjing, China) was used to visualize the target protein. The antibodies are listed in Table S6.

### **Immunofluorescence staining**

$5 \times 10^5$  cells were seeded into 24-well culture plates for 24 h, and treated with the indicated drugs or left untreated for another 24 h. The cells were washed with PBS, fixed with 4% paraformaldehyde (PFA) for 30 min, and permeabilized with 0.5% Triton X-100 for 10 min. Subsequently, cells were blocked with 10% goat serum in PBS at room temperature for 1 h, and incubated with primary antibody at 4 °C overnight. After incubation with secondary antibody for 2 h at room temperature in the dark, the nuclei were stained by DAPI (Beyotime, C1005, Shanghai, China) at room temperature for 15 min. The stained cells were observed and photographed using a fluorescent microscope (ZEISS, Jena, Germany). The antibodies are listed in Table S6.

## **Supplementary Figures and Legends**

### **Figure S1. The expression of HSPB1 was upregulated in breast cancer tissues**

#### **and associated with poor prognosis of breast cancer patients.**

(A) The heatmaps showing the differentially expressed genes in breast cancer tissues and normal tissues in TCGA and GEO databases. (B) The RNA expression of HSPB1 was upregulated in various cancers according to TCGA database. (C) The protein expression of HSPB1 was increased in breast cancer tissues compared to normal tissues based on the Human Protein Atlas database. (D) High expression of HSPB1 was associated with poor OS of breast cancer patients. (E) High expression of HSPB1 was associated with poor RFS of breast cancer patients. (F) High expression of HSPB1 was associated with poor DMFS of breast cancer patients.

### **Figure S2. HSPB1 knockdown attenuated breast cancer growth, migration, and**

#### **invasion in vitro.**

(A) HSPB1 knockdown efficiency was confirmed by qRT-PCR and western blot in breast cancer cells. (B-D) MTT (B), colony formation (C), and EdU (D) assays were performed to evaluate the effect of HSPB1 knockdown on cell proliferative ability. Scale bar = 100  $\mu\text{m}$ . (E) Wound healing assay was used to evaluate the effect of HSPB1 knockdown on the migration ability of breast cancer cells. Scale bar = 200  $\mu\text{m}$ . (F) The migratory and invasive abilities of HSPB1-knockdown breast cancer cells were assessed by transwell assay. Scale bar = 100  $\mu\text{m}$ . (G) Western blot showed the effect of HSPB1 knockdown on the expression of EMT-related proteins. (H) Representative images of morphological changes of

control and HSPB1 knockdown breast cancer cells. Scale bar = 100  $\mu$ m. (I) Morphological changes of control and HSPB1 knockdown breast cancer cells assessed by phalloidin staining. Scale bar = 75  $\mu$ m. (\*  $P < 0.05$ , \*\*  $P < 0.01$ , \*\*\*  $P < 0.001$ )

**Figure S3. HSPB1 was associated with chemoresistance of breast cancer.** (A) MDA-MB-231 and MDA-MB-468 cells were treated with different concentrations of doxorubicin. The RNA and protein expression of HSPB1 was detected. (B) MDA-MB-231 and MDA-MB-468 cells were treated with doxorubicin (1  $\mu$ M) and collected at the indicated time. The RNA and protein expression of HSPB1 was evaluated. (C) The expression of HSPB1 was upregulated in progressive breast cancer tissues compared to chemo-sensitive tissues. (\*  $P < 0.05$ , \*\*  $P < 0.01$ , \*\*\*  $P < 0.001$ )

**Figure S4. HSPB1 knockdown sensitized breast cancer cells to doxorubicin.** (A) Inhibitory rates of MDA-MB-231 and MDA-MB-468 cells with or without HSPB1 knockdown was analyzed by MTT assay 48 h after treatment with different concentrations of doxorubicin. (B) HSPB1 knockdown efficiency was confirmed by qRT-PCR in MDA-MB-231/DOX cells. (C-E) MTT (C), EdU (D), and colony formation (E) assays were performed to evaluate the effect of HSPB1 knockdown on proliferative ability of MDA-MB-231/DOX cells. Scale bar = 100  $\mu$ m. (F-G) Wound healing assay (Scale bar = 200  $\mu$ m) (F), and transwell assay (Scale bar = 100  $\mu$ m) (G) were used to assess the migratory and invasive abilities of MDA-MB-231/DOX cells.

(\* P < 0.05, \*\* P < 0.01, \*\*\* P < 0.001)

**Figure S5. The expression of HSPB1 was associated with ferroptosis.** (A)

MDA-MB-231 and MDA-MB-468 cells were treated with different concentrations of erastin for 48 h, and RNA and protein expression levels of HSPB1 were assayed by qRT-PCR or western blot. (B) Analysis of lipid ROS in MDA-MB-231 and MDA-MB-468 cells with or without HSPB1 overexpression after treatment with erastin (10  $\mu$ M, 48 h). (C) Analysis of lipid ROS in MDA-MB-231 and MDA-MB-468 cells with or without HSPB1 knockdown after treatment with erastin (10  $\mu$ M, 48 h). (D-E) Cell viability (D) and cellular ROS levels (E) in transfected MDA-MB-231 and MDA-MB-468 cells after indicated treatment. (F-H) Cell viability (F), ROS levels (G) and cellular MDA levels (H) were detected in MDA-MB-231/DOX cells with or without HSPB1 knockdown 48 h after treatment with 10  $\mu$ M or 20  $\mu$ M erastin plus either DMSO or 10  $\mu$ M Ferrostatin-1. (\* P < 0.05, \*\* P < 0.01, \*\*\* P < 0.001)

**Figure S6. HSPB1 knockdown enhanced doxorubicin-induced ferroptosis in breast cancer cells.** (A-B) ROS levels (A) and cellular MDA levels (B) were

determined in MDA-MB-231, MDA-MB-468, and MDA-MB-231/DOX cells with or without HSPB1 knockdown 48 h after treatment with 1  $\mu$ M doxorubicin. (C-E) Cell viability (C), cellular ROS levels (D), and cellular MDA levels (E) in MDA-MB-231 and MDA-MB-468 cells with or without HSPB1 knockdown after indicated treatment.

(F-H) Cell viability (F), cellular ROS levels (G), and cellular MDA levels (H) in MDA-MB-231/DOX cells with or without HSPB1 knockdown after treatment with doxorubicin plus either DMSO or Ferrostatin-1. (ns, no significance, \*  $P < 0.05$ , \*\*  $P < 0.01$ , \*\*\*  $P < 0.001$ )

**Figure S7. HSPB1 mediated the sensitivity of breast cancer cells to paclitaxel through suppressing ferroptosis.** (A) Inhibitory rates of MDA-MB-231 and MDA-MB-468 cells with or without HSPB1 overexpression 48 h after treatment with different concentrations of paclitaxel. (B) Inhibitory rates of MDA-MB-231 and MDA-MB-468 cells with or without HSPB1 knockdown 48 h after treatment with different concentrations of paclitaxel. (C) Cellular ROS levels of MDA-MB-231 and MDA-MB-468 cells with or without HSPB1 overexpression 48 h after treatment with 10  $\mu$ M paclitaxel. (D) Cellular ROS levels of MDA-MB-231 and MDA-MB-468 cells with or without HSPB1 knockdown 48 h after treatment with 10  $\mu$ M paclitaxel. (E) Cell viability of MDA-MB-231 and MDA-MB-468 cells with or without HSPB1 overexpression 48 h after indicated treatment. (F) Cell viability of MDA-MB-231 and MDA-MB-468 cells with or without HSPB1 knockdown 48 h after indicated treatment. (G) Cellular ROS levels of MDA-MB-231 and MDA-MB-468 cells with or without HSPB1 overexpression 48 h after indicated treatment. (H) Cellular ROS levels of MDA-MB-231 and MDA-MB-468 cells with or without HSPB1 knockdown 48 h after indicated treatment. (ns, no significance, \*  $P < 0.05$ , \*\*  $P < 0.01$ , \*\*\*  $P < 0.001$ )

**Figure S8. HSPB1 knockdown attenuated activation of NF- $\kappa$ B signaling.** (A)

Western blot was performed using cell lysates of MDA-MB-231 and MDA-MB-468 cells with or without HSPB1 knockdown. (B-D) NF- $\kappa$ B transcriptional activity was determined by NF- $\kappa$ B activation reporter assay (B), western blot (C), and qRT-PCR (D). (E) After 24h of treatment with 1  $\mu$ M doxorubicin, immunofluorescence was performed to detect the expression of HSPB1, Survivin, and IL6 in MDA-MB-231 and MDA-MB-468 cells with or without HSPB1 knockdown. Scale bar = 50  $\mu$ m. (\* P < 0.05, \*\* P < 0.01, \*\*\* P < 0.001)

**Figure S9. Restoring NF- $\kappa$ B activity partially reversed the inhibited effect of**

**HSPB1 knockdown in breast cancer cells.** MDA-MB-231 and MDA-MB-468 cells were transfected with negative control siRNA (Ctrl-siRNA), ctrl-siRNA + si-HSPB1, or si-HSPB1 + si-I $\kappa$ B- $\alpha$  for 48 h. (A) Wound healing assay was performed to determine cell migration. Scale bar = 200  $\mu$ m. (B) The MTT assay was used to analyze the viability of transfected cells following 10  $\mu$ M erastin plus either DMSO or 10  $\mu$ M Fer-1 treatment. (\* P < 0.05, \*\* P < 0.01, \*\*\* P < 0.001)

**Figure S10. The effect of HSPB1 on the behaviors of THP1.** (A) The correlation

between HSPB1 expression and the level of macrophage infiltration in tumor microenvironment was analyzed. (B-C) The supernatant of breast cancer cells with or without HSPB1 knockdown was added in the upper chamber or lower chamber, and

transwell assay was used to detect the migration of macrophages (B) or chemotaxis (C). (D-E) The conditioned medium from HSPB1 overexpressing cells or control cells was added in the upper chamber or lower chamber, and transwell assay was used to detect the migration of macrophages (D) or chemotaxis (E). Scale bar = 100  $\mu$ m. (\*  $P < 0.05$ , \*\*  $P < 0.01$ , \*\*\*  $P < 0.001$ )



Figure S1

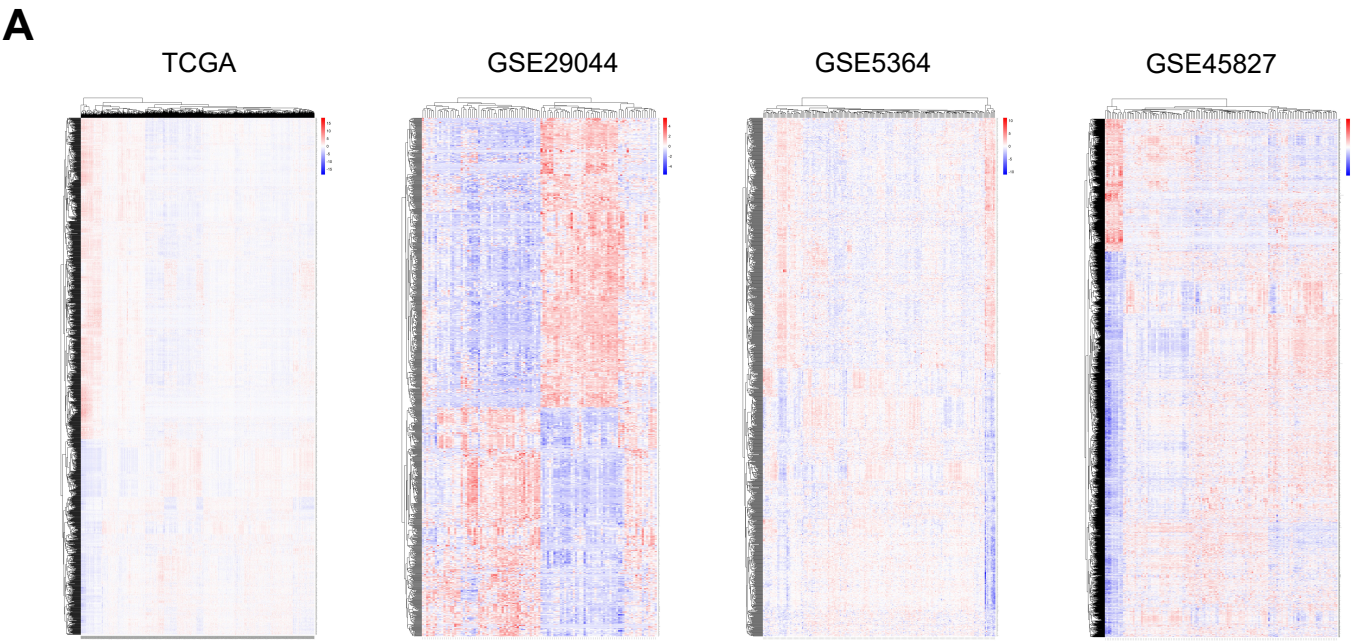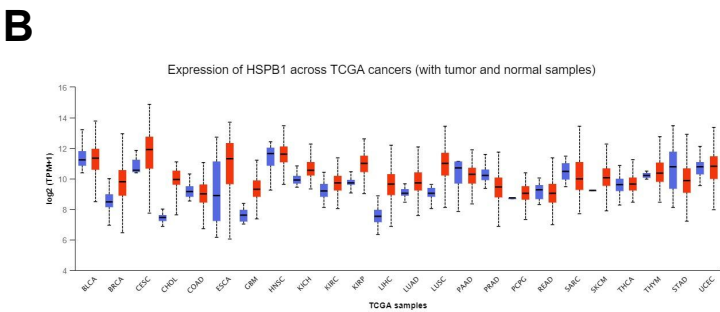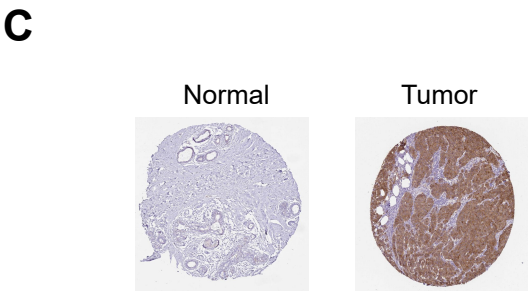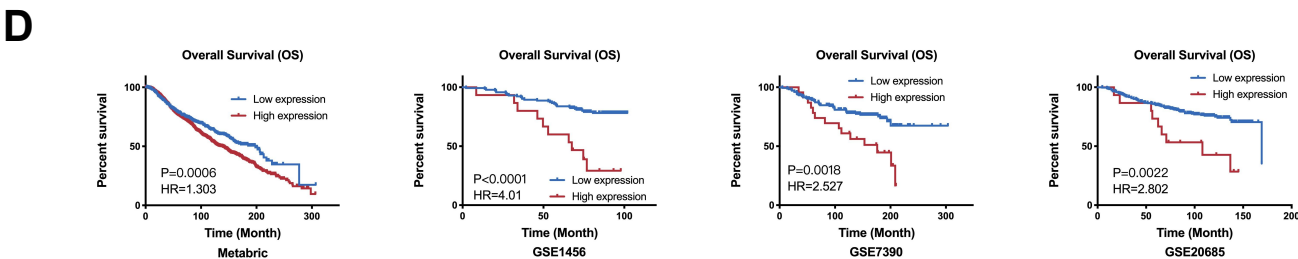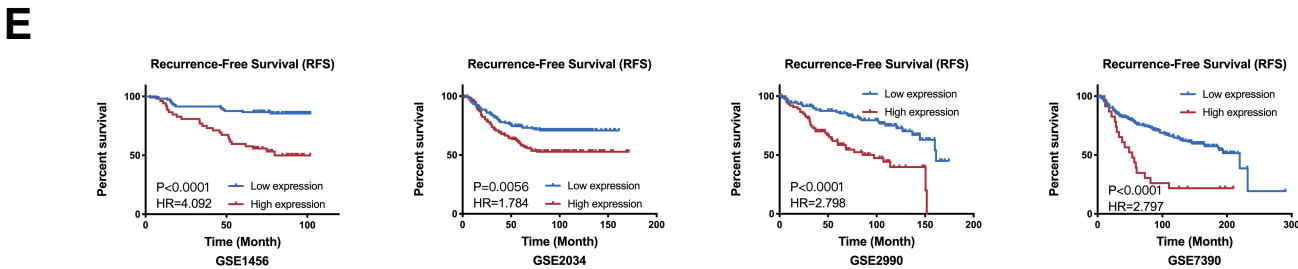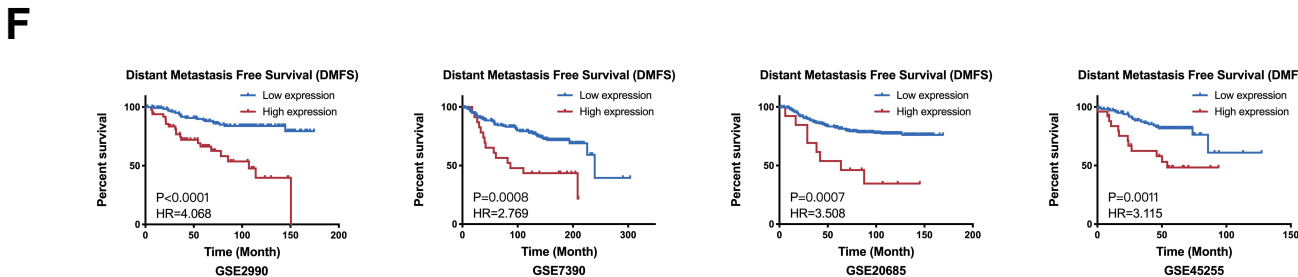

**Figure S2**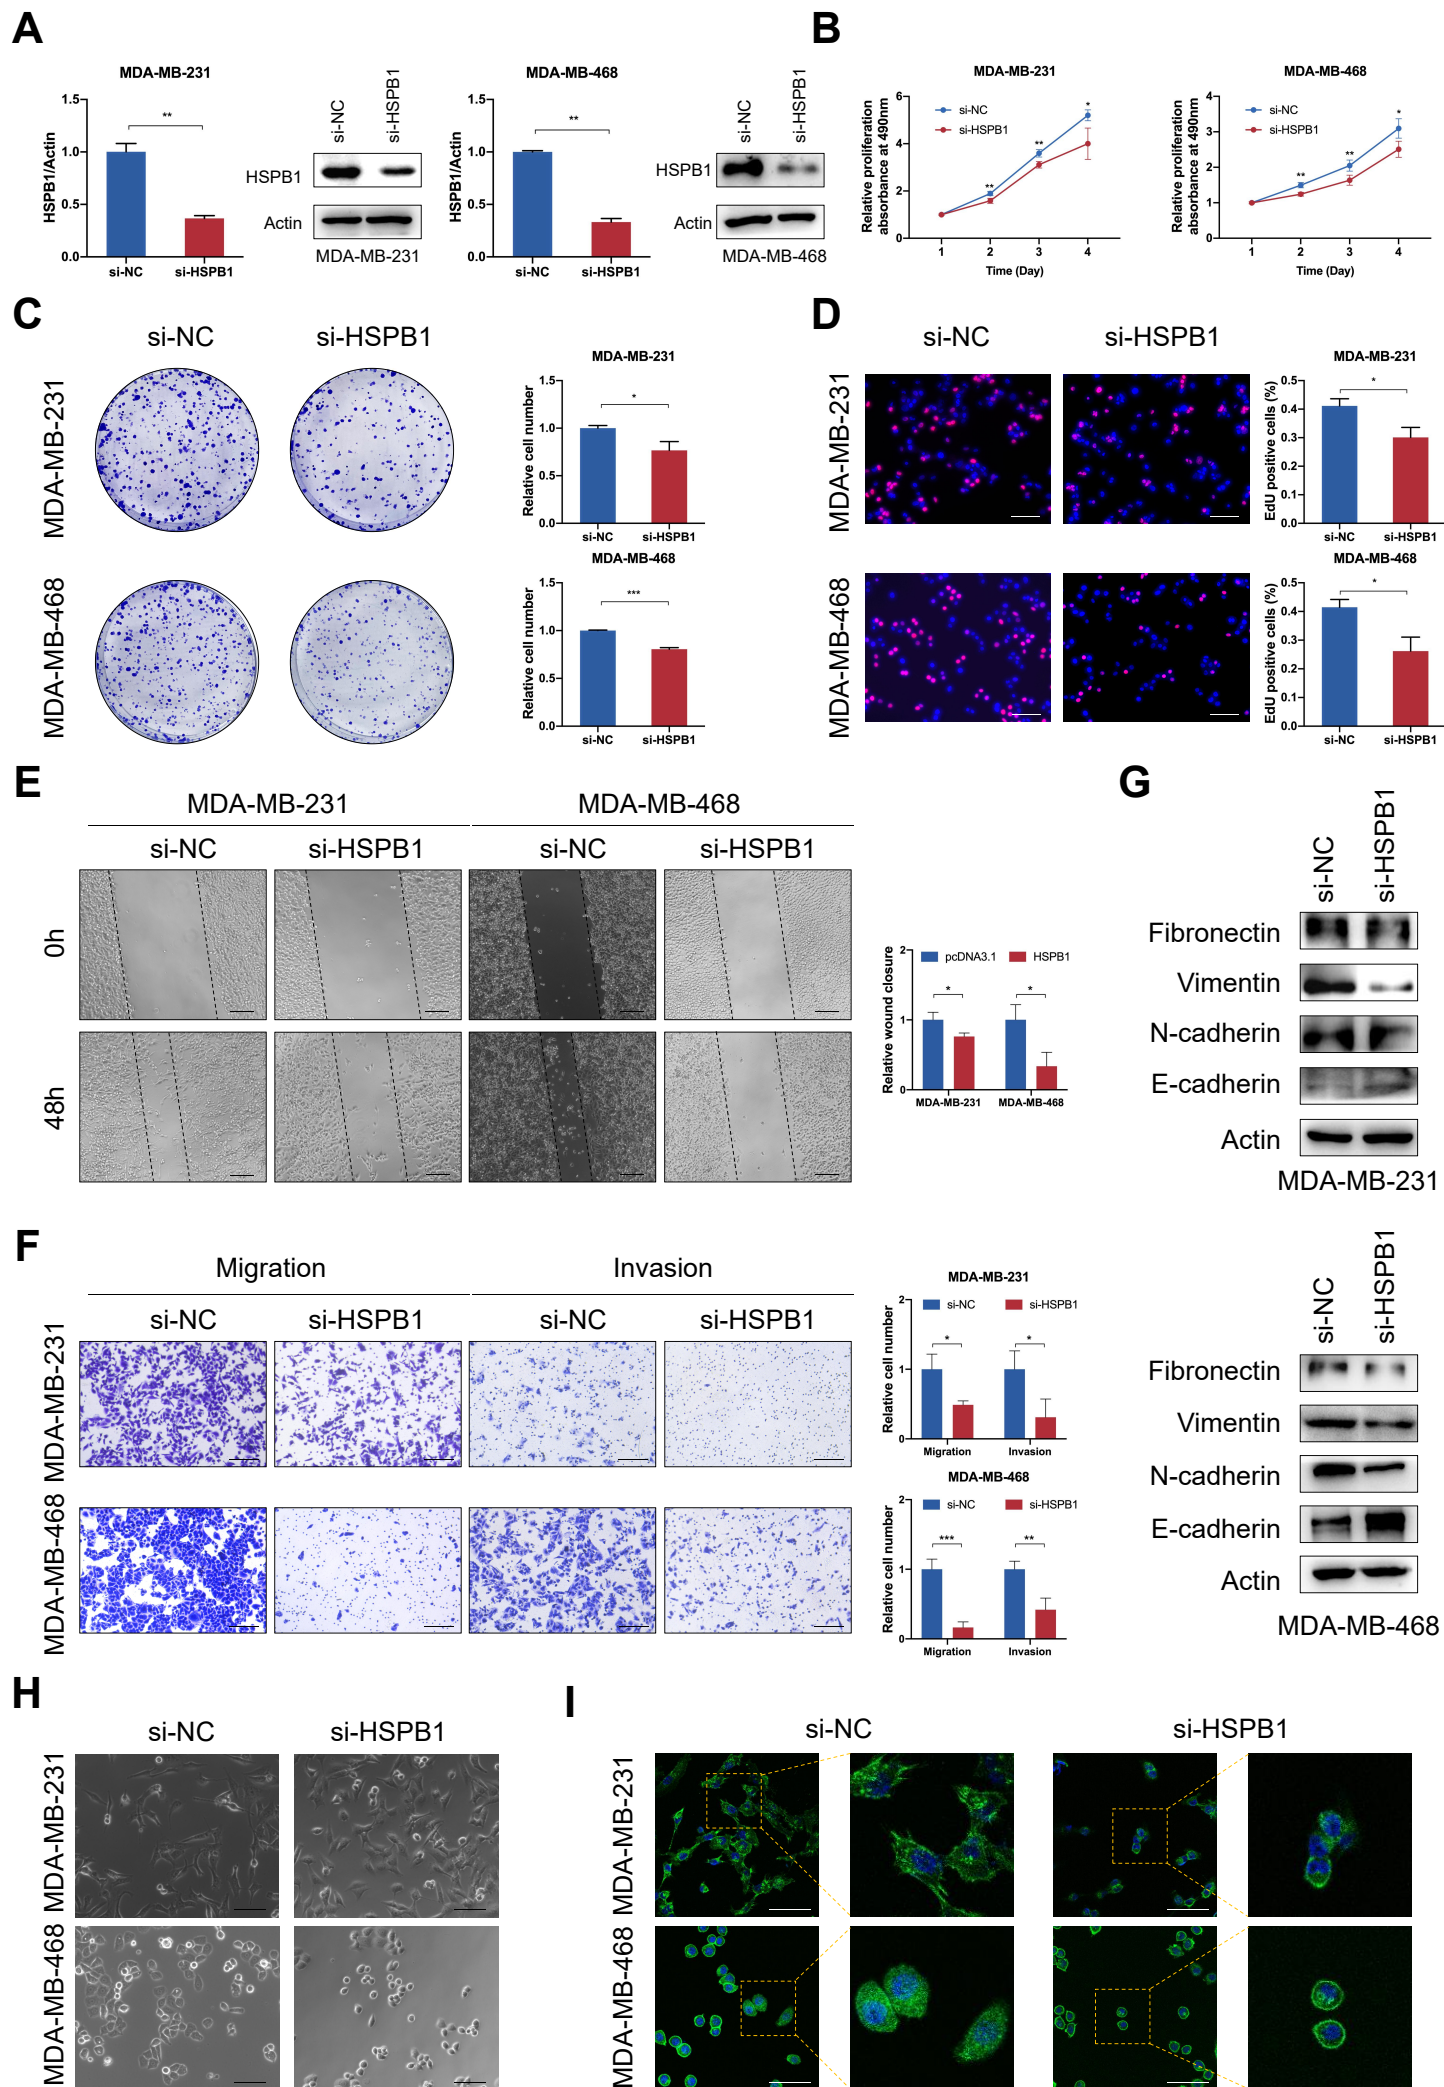

Figure S3

A

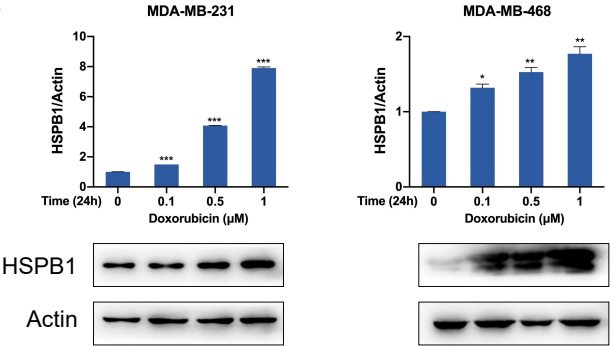

B

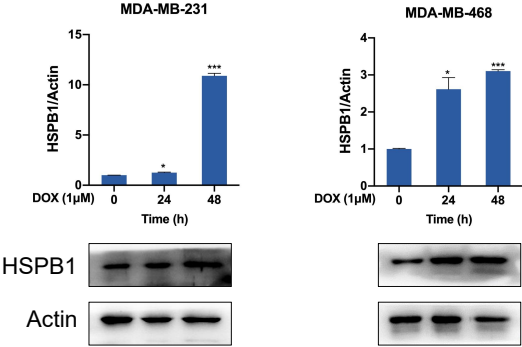

C

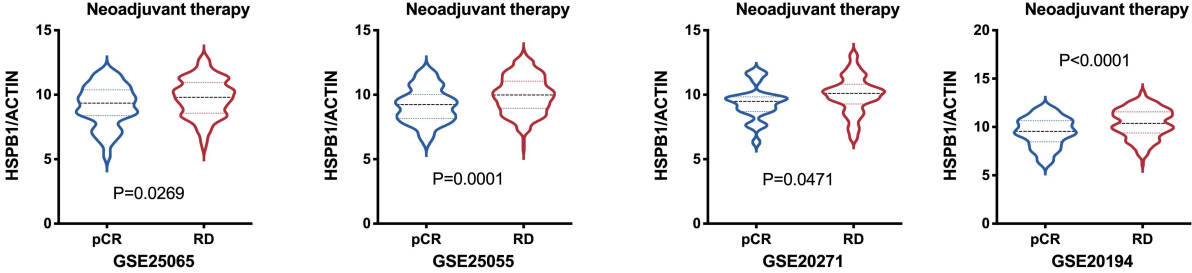



Figure S4

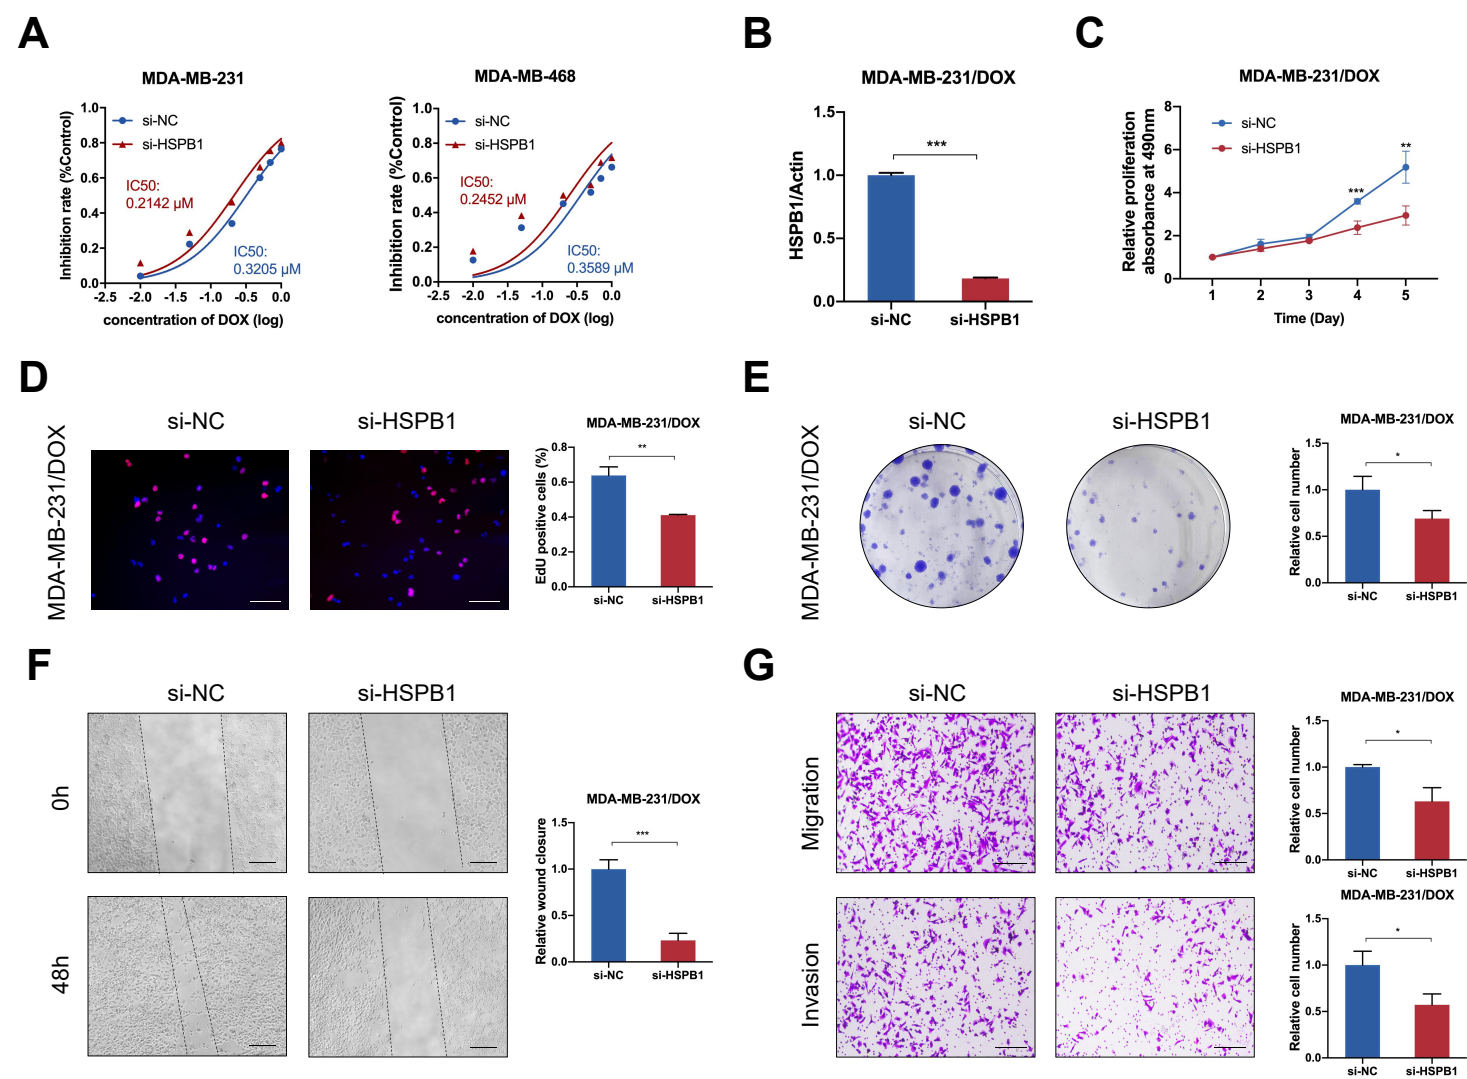

**Figure S5****A**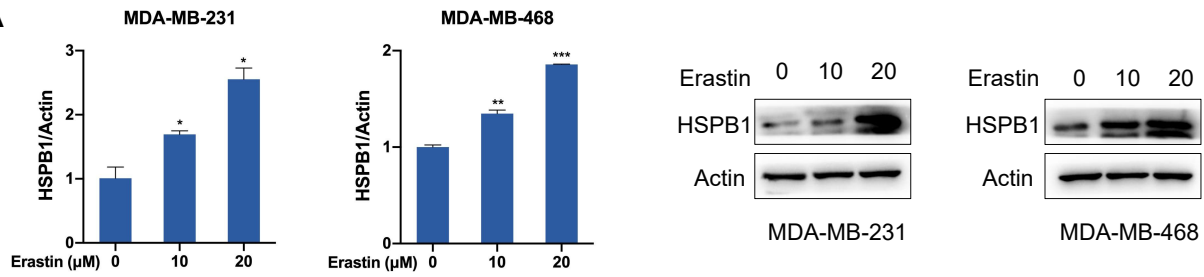**B**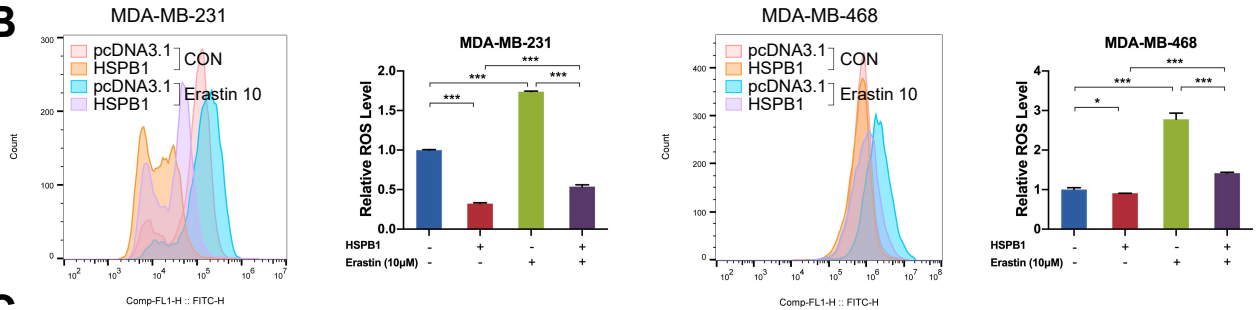**C**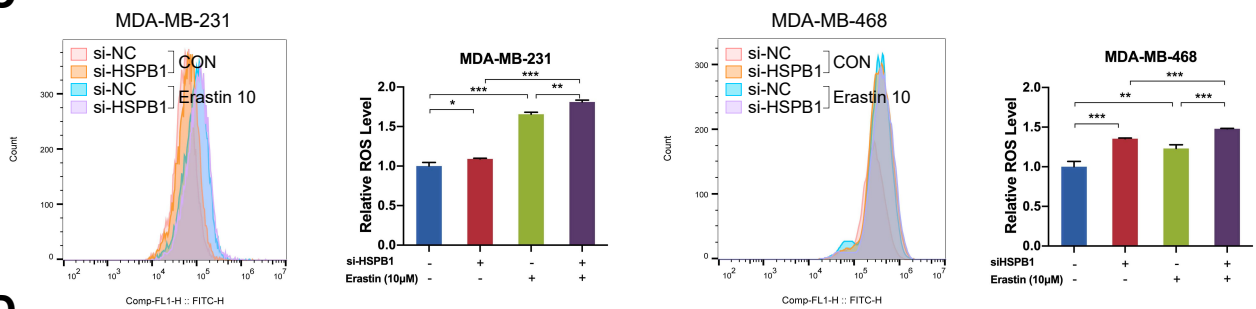**D**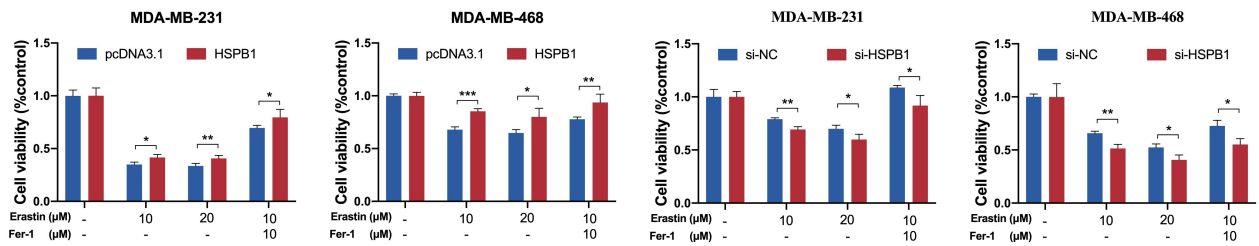**E**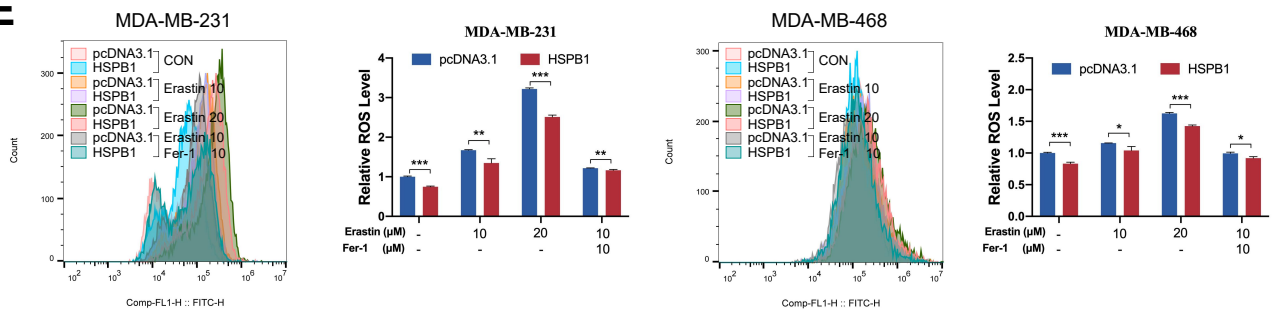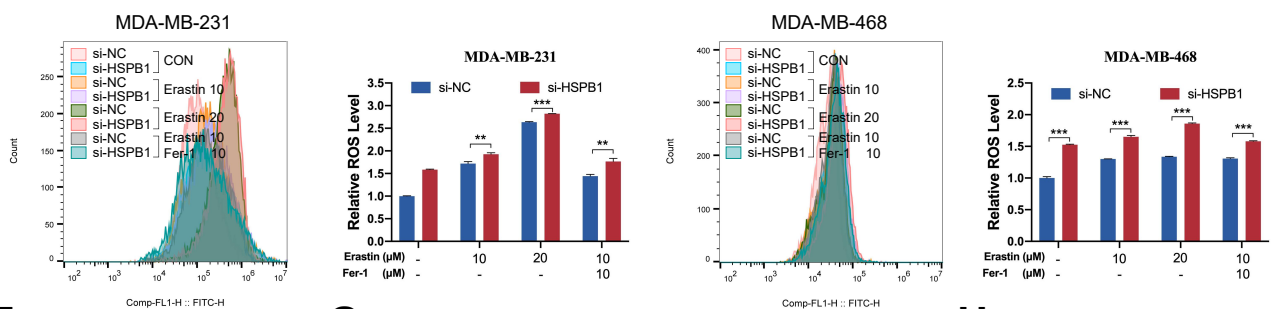**F**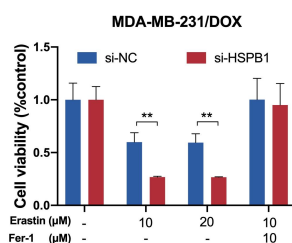**G**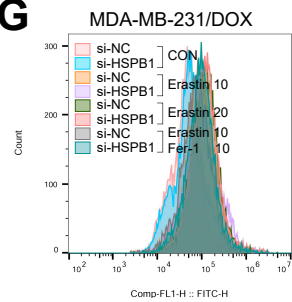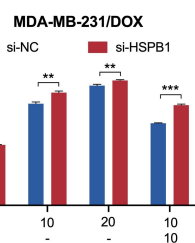**H**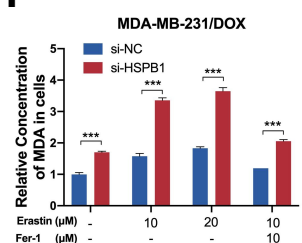

Figure S6

A

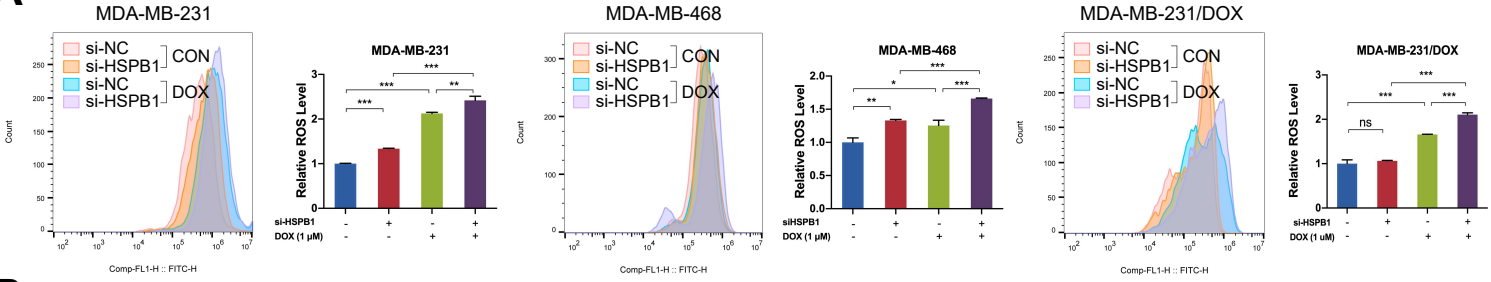

B

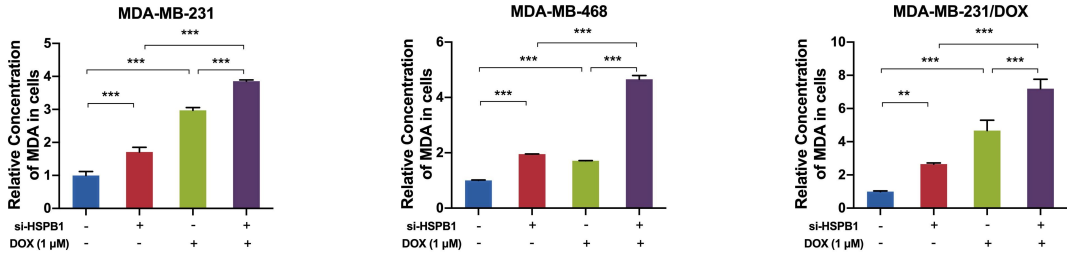

C

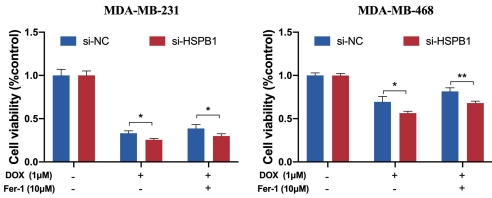

D

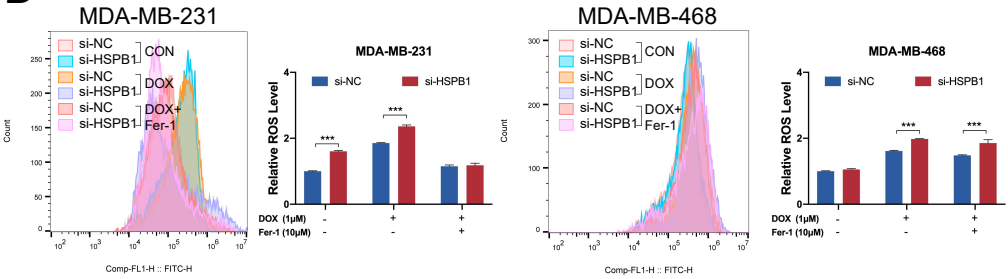

E

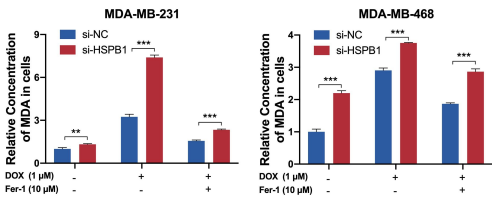

F

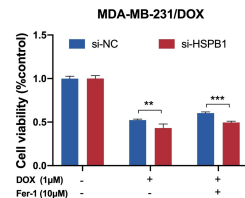

G

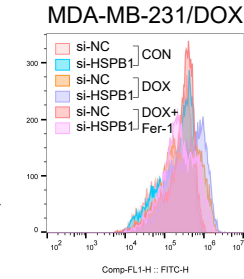

H

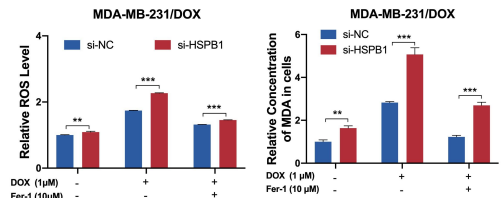

**Figure S7**

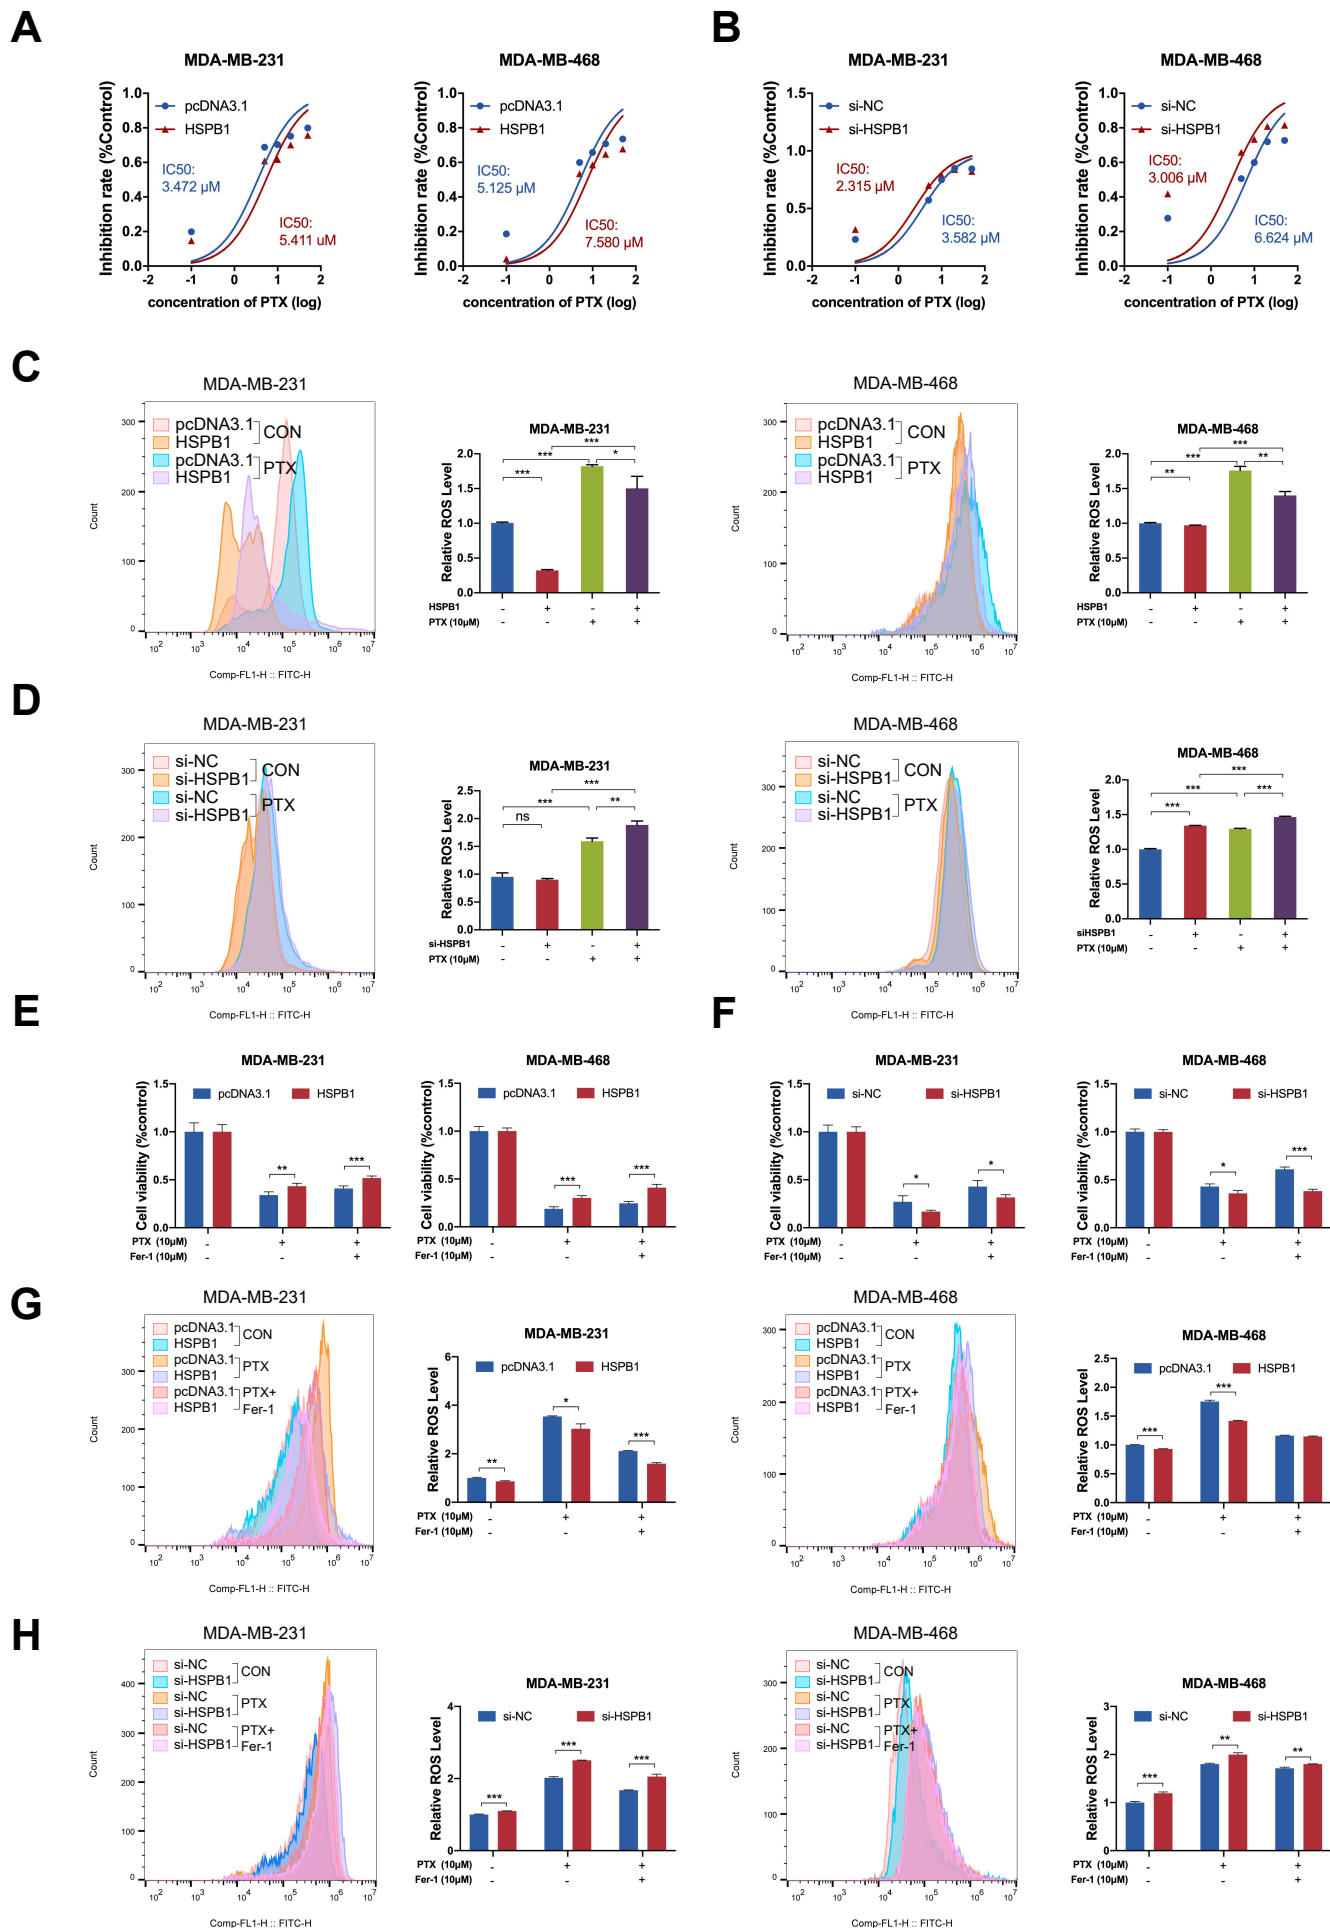



Figure S8

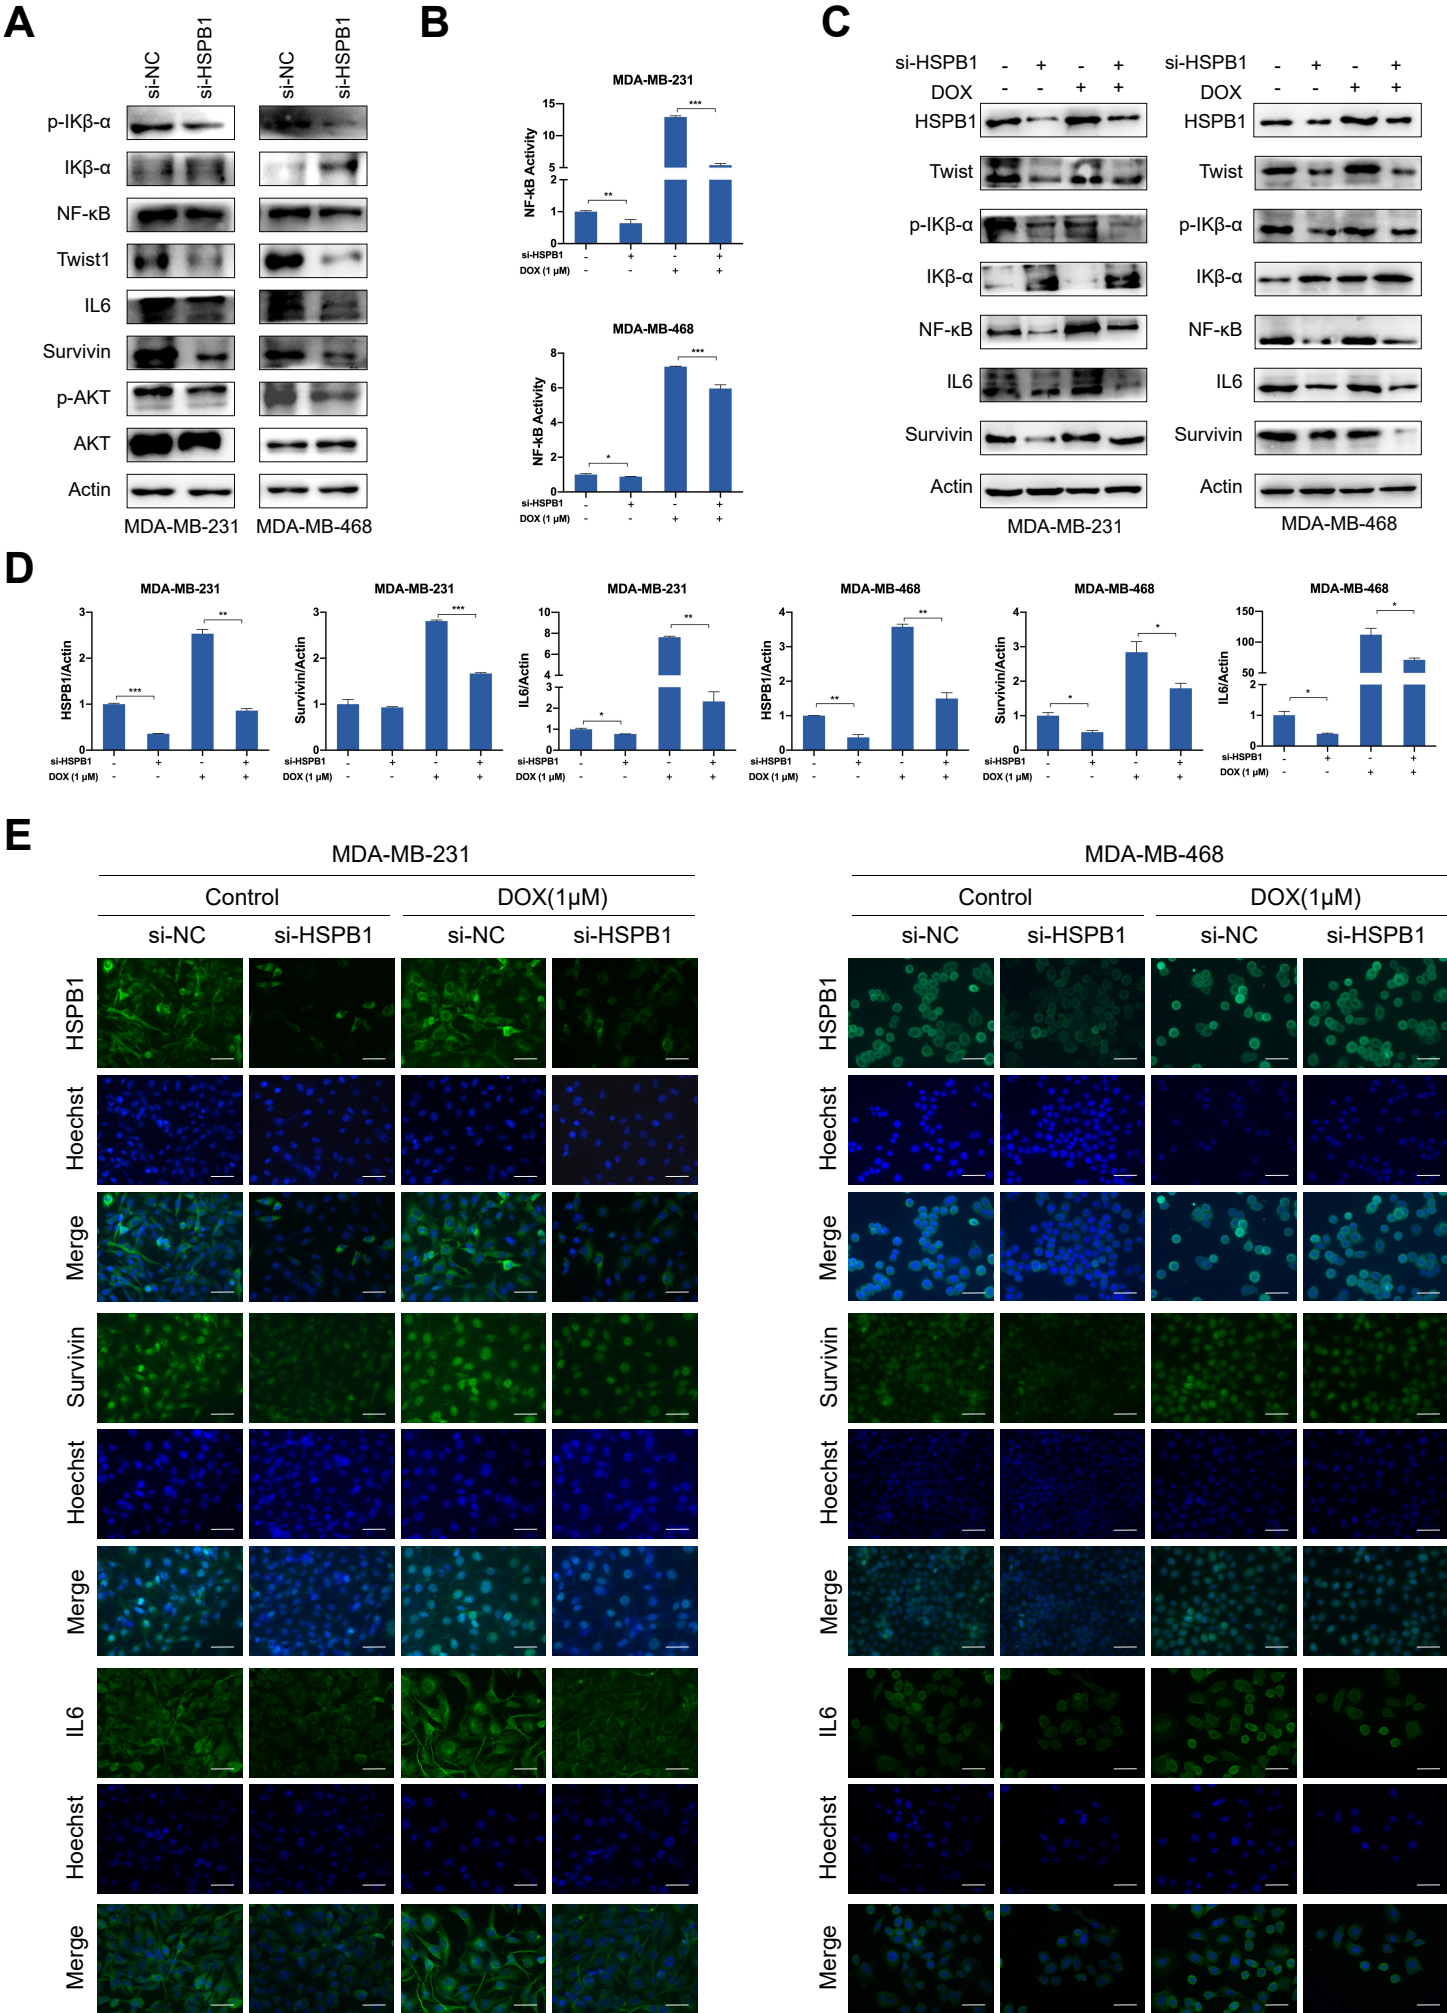



Figure S9

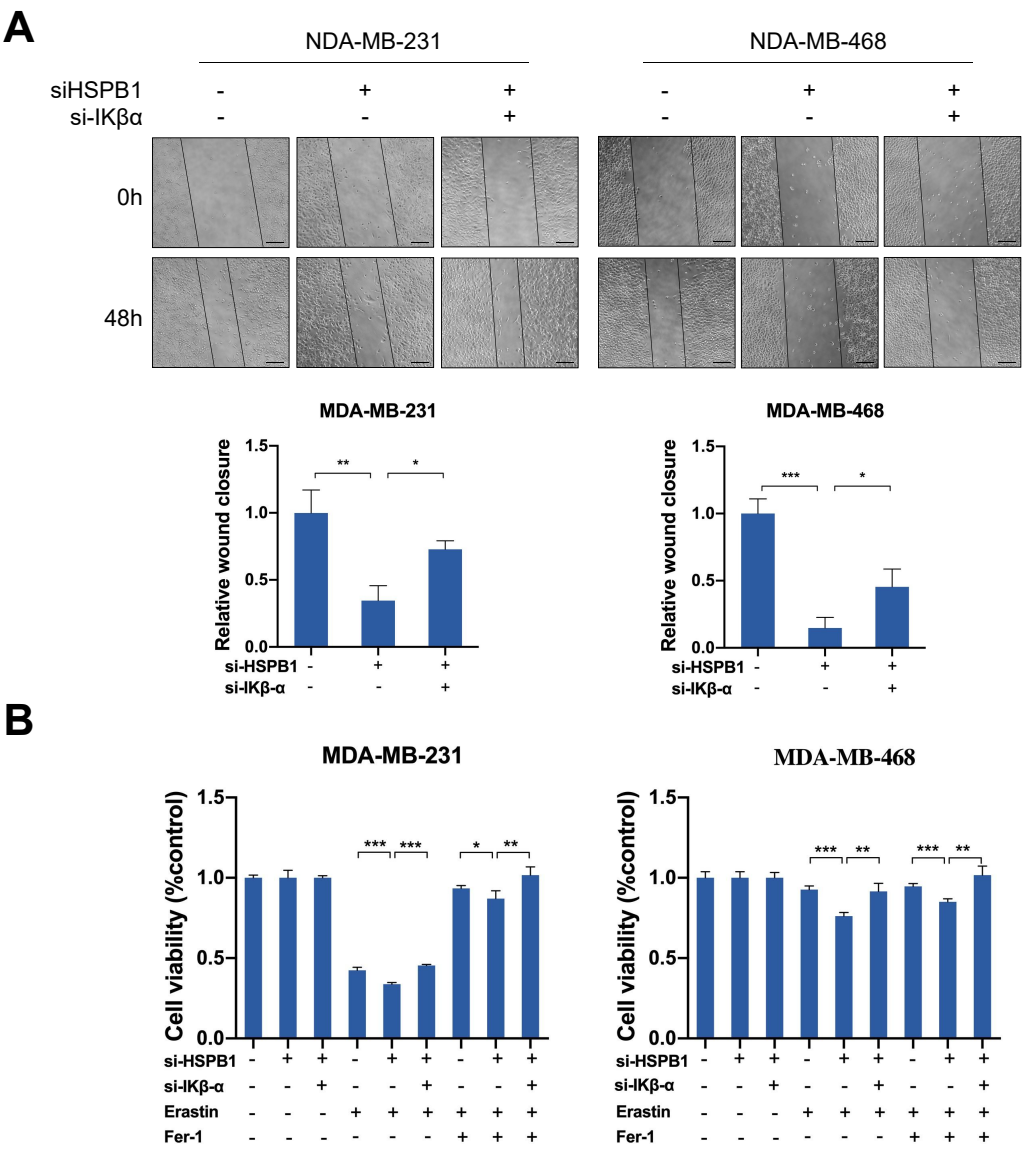

Figure S10

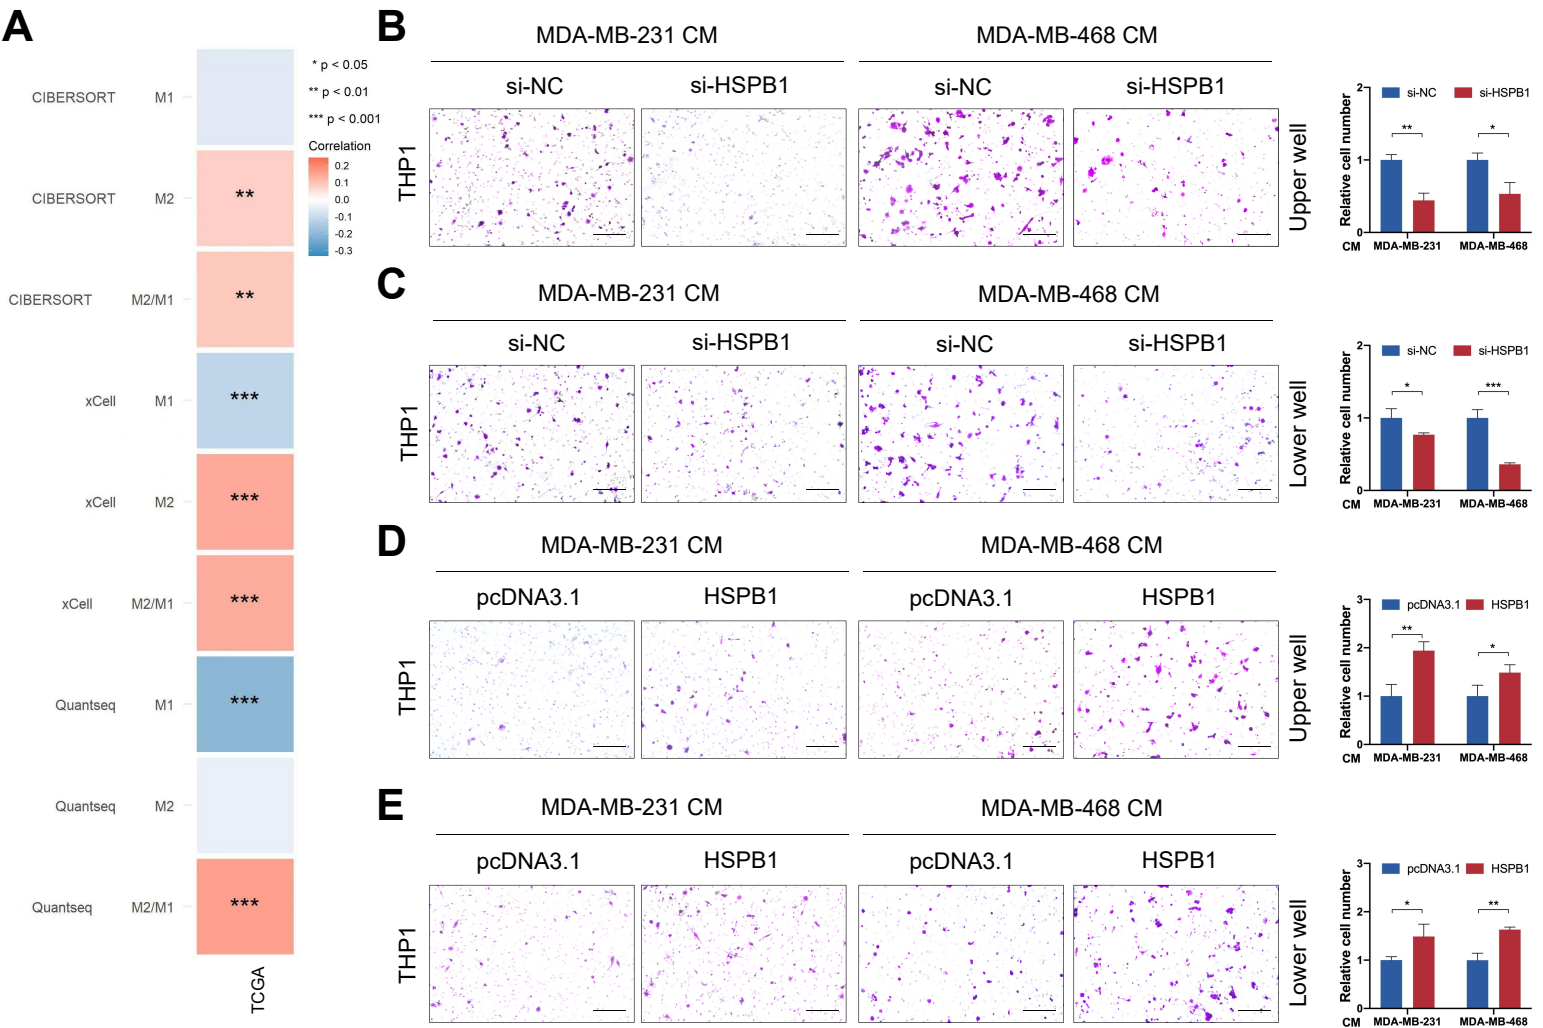

## Supplementary Tables

**Table S1. Correlations between HSPB1 expression and clinicopathologic features in 131 breast cancer patients.**

| Characteristics    | HSPB1-low (n=88) | HSPB1-high (n=43) | p value           |
|--------------------|------------------|-------------------|-------------------|
| Age                |                  |                   | p=0.291           |
| <59                | 67 (76.14%)      | 29 (67.44%)       |                   |
| ≥59                | 21 (23.86%)      | 14 (32.56%)       |                   |
| Tumor stage        |                  |                   | p=0.806           |
| ≤T1                | 44 (50.00%)      | 20 (46.51%)       |                   |
| >T1                | 43 (48.86%)      | 23 (53.49%)       |                   |
| unknown            | 1 (1.14%)        | 0 (0.00%)         |                   |
| LN metastasis      |                  |                   | p=0.166           |
| 0                  | 61 (69.32%)      | 23 (53.48%)       |                   |
| 1-3                | 16 (18.18%)      | 10 (23.26%)       |                   |
| >3                 | 11 (12.50%)      | 10 (23.26%)       |                   |
| Distant metastasis |                  |                   | <b>p&lt;0.001</b> |
| No                 | 76 (86.36%)      | 21 (48.84%)       |                   |
| Yes                | 7 (7.95%)        | 6 (13.95%)        |                   |
| unknown            | 5 (5.68%)        | 16 (37.21%)       |                   |
| Histologic grade   |                  |                   | p=0.166           |
| G1                 | 7 (7.95%)        | 0 (0.00%)         |                   |
| G2                 | 46 (52.27%)      | 20 (46.51%)       |                   |
| G3                 | 27 (30.68%)      | 19 (44.19%)       |                   |
| unknown            | 8 (9.09%)        | 4 (9.30%)         |                   |
| ER status          |                  |                   | p=0.721           |
| negative           | 52 (59.09%)      | 24 (55.81%)       |                   |
| positive           | 36 (40.91%)      | 19 (44.19%)       |                   |
| PR status          |                  |                   | p=0.463           |
| negative           | 55 (62.50%)      | 24 (55.81%)       |                   |
| positive           | 33 (37.50%)      | 19 (44.19%)       |                   |
| HER-2 status       |                  |                   | p=0.154           |
| negative           | 81 (92.05%)      | 35 (81.40%)       |                   |
| positive           | 1 (1.14%)        | 2 (4.65%)         |                   |
| unknown            | 6 (6.81%)        | 6 (13.95%)        |                   |
| Ki67 expression    |                  |                   | p=0.052           |
| low                | 22 (25.00%)      | 6 (13.95%)        |                   |
| high               | 66 (75.00%)      | 35 (81.40%)       |                   |
| unknown            | 0 (0.00%)        | 2 (4.65%)         |                   |

Abbreviation: LN=lymph nodes; ER=estrogen receptor; PR=progesterone receptor; HER-2: human epidermal growth factor receptor-2; p value<0.05 marked in bond font to show statistical significant.

**Table S2. Univariate and multivariate Cox regression analyses for OS of 131 breast cancer patients.**

|                                                | Univariate analysis           |                  | Multivariate analysis |              |
|------------------------------------------------|-------------------------------|------------------|-----------------------|--------------|
|                                                | HR (95% CI)                   | p value          | HR (95% CI)           | p value      |
| Age ( $\geq 59$ vs. $< 59$ )                   | 3.028 (1.259-7.281)           | <b>0.013</b>     | 2.704 (1.123-6.510)   | <b>0.026</b> |
| Histologic grade                               |                               |                  |                       |              |
| G2 vs. G1                                      | 9317.972<br>(0.000-3.001E+78) | 0.917            | -                     | -            |
| G3 vs. G1                                      | 8650.070<br>(0.000-2.787E+78) | 0.918            | -                     | -            |
| Unknown vs. G1                                 | 8523.247<br>(0.000-2.758E+78) | 0.918            | -                     | -            |
| Tumor size ( $> T1$<br>vs. $\leq T1$ +unknown) | 1.313 (0.543-3.172)           | 0.545            | -                     | -            |
| LN metastasis                                  |                               |                  |                       |              |
| 1-3 vs. 0                                      | 1.983 (0.580-6.780)           | 0.275            | 2.067 (0.590-7.241)   | 0.256        |
| $> 3$ vs. 0                                    | 8.050 (2.902-22.326)          | <b>&lt;0.001</b> | 6.213 (2.165-17.827)  | <b>0.001</b> |
| Distant metastasis<br>(Yes vs. No+unknown)     | 1.579 (0.462-5.394)           | 0.466            | -                     | -            |
| ER status (pos vs. neg)                        | 1.017 (0.400-2.584)           | 0.973            | -                     | -            |
| PR status (pos vs. neg)                        | 0.878 (0.339-2.272)           | 0.788            | -                     | -            |
| HER-2 status (pos vs.<br>neg+unknown)          | 2.433 (0.322-18.388)          | 0.389            | -                     | -            |
| Ki67 expression (pos<br>vs. neg+unknown)       | 1.185 (0.395-3.559)           | 0.762            | -                     | -            |
| HSPB1 expression<br>(High vs. Low)             | 7.042 (2.556-19.398)          | <b>&lt;0.001</b> | 5.520 (1.984-15.355)  | <b>0.001</b> |

Abbreviation: 95% CI=95% confidence interval; HR=hazard ratio; LN=lymph nodes; ER=estrogen receptor; PR=progesterone receptor; HER-2: human epidermal growth factor receptor-2; p value  $< 0.05$  marked in bold font to show statistical significant.

**Table S3. Univariate and multivariate Cox regression analyses for DFS of 131 breast cancer patients.**

|                                             | Univariate analysis           |                  | Multivariate analysis |                  |
|---------------------------------------------|-------------------------------|------------------|-----------------------|------------------|
|                                             | HR (95% CI)                   | p value          | HR (95% CI)           | p value          |
| Age ( $\geq 59$ vs. $< 59$ )                | 2.412 (1.169-4.975)           | <b>0.017</b>     | 2.171 (1.038-4.540)   | <b>0.039</b>     |
| Histologic grade                            |                               |                  |                       |                  |
| G2 vs. G1                                   | 9683.222<br>(0.000-1.018E+69) | 0.904            | -                     | -                |
| G3 vs. G1                                   | 9420.873<br>(0.000-9.911E+68) | 0.905            | -                     | -                |
| Unknown vs. G1                              | 5068.560<br>(0.000-5.361E+68) | 0.911            | -                     | -                |
| Tumor size ( $> T1$ vs. $\leq T1$ +unknown) | 1.638 (0.788-3.407)           | 0.187            | -                     | -                |
| LN metastasis                               |                               |                  |                       |                  |
| 1-3 vs. 0                                   | 2.956 (1.162-7.520)           | <b>0.023</b>     | 3.677 (1.348-10.033)  | <b>0.011</b>     |
| $> 3$ vs. 0                                 | 10.279 (4.180-25.280)         | <b>&lt;0.001</b> | 7.422 (2.808-19.617)  | <b>&lt;0.001</b> |
| Distant metastasis (Yes vs. No+unknown)     | 6.412 (3.105-13.241)          | <b>&lt;0.001</b> | 2.726 (1.284-5.789)   | <b>0.009</b>     |
| ER status (pos vs. neg)                     | 1.531 (0.683-3.432)           | 0.301            | -                     | -                |
| PR status (pos vs. neg)                     | 1.396 (0.625-3.120)           | 0.415            | -                     | -                |
| HER-2 status (pos vs. neg+unknown)          | 2.242 (0.298-16.885)          | 0.433            | -                     | -                |
| Ki67 expression (pos vs. neg+unknown)       | 0.932 (0.398-2.183)           | 0.871            | -                     | -                |
| HSPB1 expression (High vs. Low)             | 5.753 (2.631-12.579)          | <b>&lt;0.001</b> | 4.279 (1.886-9.709)   | <b>0.001</b>     |

Abbreviation: 95% CI=95% confidence interval; HR=hazard ratio; LN=lymph nodes; ER=estrogen receptor; PR=progesterone receptor; HER-2: human epidermal growth factor receptor-2; p value  $< 0.05$  marked in bold font to show statistical significant.

**Table S4. SiRNA used for transfection.**

| Name                     | Sense (5'-3')       | Antisense (5'-3')   |
|--------------------------|---------------------|---------------------|
| si-HSPB1                 | GGUGCUUCACGCGGAAAUA | UAUUUCCGCGUGAAGCACC |
| si-Ik $\beta$ - $\alpha$ | CCGAGACUUUCGAGGAAAU | AUUUCCUCGAAAGUCUCGG |
| si-NC                    | UUCUCCGAACGUGUCACGU | ACGUGACACGUUCGGAGAA |

**Table S5. Primers used for qRT-PCR.**

| Gene                  | Forward (5'-3')        | Reverse (5'-3')        |
|-----------------------|------------------------|------------------------|
| HSPB1                 | AAGGATGGCGTGGTGGAGA    | GAGGAGGAAACTTGGGTGGG   |
| IL6                   | CAGCCACTCACCTCTTCAG    | TGCCAGTGCCTCTTTGCTG    |
| Survivin              | AACTGGCCCTTCTTGGAG     | GGTCGTCATCTGGCTCCC     |
| Ik $\beta$ - $\alpha$ | TCCACTCCATCCTGAAGGCTAC | CAAGGACACCAAAAGCTCCACG |
| Actin                 | CACTGTGCCCATCTACGAG    | AATGTCACGCACGATTTC     |

**Table S6. Antibodies used in the experiments.**

| <b>Antigen</b>          | <b>Supplier</b>           | <b>Catalog #</b> | <b>Application</b>                  |
|-------------------------|---------------------------|------------------|-------------------------------------|
| Actin                   | Proteintech               | 60008-1-Ig       | IB (1:2 000)                        |
| Fibronectin             | Proteintech               | 15613-1-AP       | IB (1:1 000)                        |
| N-cadherin              | Proteintech               | YT2988           | IB (1:1 000)                        |
| E-cadherin              | Proteintech               | 20874-1-AP       | IB (1:1 000)                        |
| Vimentin                | Cell Signaling Technology | 5741             | IB (1:1 000)                        |
| HSPB1                   | Proteintech               | 18284-1-AP       | IB (1:1 000) IF (1:200) IHC (1:200) |
| Twist                   | Proteintech               | 25465-1-AP       | IB (1:1 000)                        |
| p-IK $\beta$ - $\alpha$ | Cell Signaling Technology | 5209S            | IB (1:1 000)                        |
| IK $\beta$ - $\alpha$   | Proteintech               | 10268-1-AP       | IB (1:1 000) IF (1:200) IHC (1:200) |
| NF- $\kappa$ B          | Cell Signaling Technology | 8242             | IB (1:1 000) IF (1:200) IHC (1:200) |
| IL6                     | Proteintech               | 21865-1-AP       | IB (1:1 000) IF (1:200) IHC (1:200) |
| Survivin                | Proteintech               | 10508-1-AP       | IB (1:1 000) IF (1:200) IHC (1:200) |
| p-AKT                   | Proteintech               | 28731-1-AP       | IB (1:1 000)                        |
| AKT                     | Proteintech               | 10176-2-AP       | IB (1:1 000)                        |
| Lamin A/C               | Proteintech               | 10298-1-AP       | IB (1:1 000)                        |
| Flag                    | Sigma-Aldrich             | F2555            | IB (1:1 000)                        |
| HA                      | Sigma-Aldrich             | H6908            | IB (1:1 000)                        |
| Ki67                    | Proteintech               | 27309-1-AP       | IHC(1:500)                          |
| HRP-anti-mouse          | Cell Signaling Technology | 7076             | IB (1:5 000)                        |
| HRP-anti-rabbit         | Cell Signaling Technology | 7074             | IB (1:5 000)                        |
